# Supplementary material for: RIPK1 in necroptosis and recent progress in related pharmaceutics
Source: Front Immunol. 2025 Feb 11;16:1480027. doi: 10.3389/fimmu.2025.1480027 (PMC11850271; doi:10.3389/fimmu.2025.1480027)
Supplement: Supplementary file 1 [file Table1.xlsx]

## Sheet: Table S1
Table S1: Recent R&D progress of RIPK1-related drugs
Main Name	Under Active Development	Phase	Organization	Drug Names (all)	Condition	Indication	Administration Route	Formulation
ABBV-668	Yes	Phase II	AbbVie	ABBV-668 (Code)	Ulcerative colitis	Treatment of moderate to severe ulcerative colitis	Oral	Capsules
eclitasertib	Yes	Phase II	Sanofi	eclitasertib (Generic) 975AT1P9J6 (Code) DNL-758 (Code) SAR-443122 (Code)	Ulcerative colitis	In adult patients with moderate to severe ulcerative colitis	Oral	Capsule
eclitasertib	No	Phase I	Sanofi	eclitasertib (Generic) 975AT1P9J6 (Code) DNL-758 (Code) SAR-443122 (Code)	Inflammatory disorders	In healthy volunteers
eclitasertib	No	Phase I	Sanofi	eclitasertib (Generic) 975AT1P9J6 (Code) DNL-758 (Code) SAR-443122 (Code)	Severe acute respiratory syndrome coronavirus 2 (SARS-CoV-2) infection (COVID-19)	In hospitalized patients with severe acute respiratory syndrome coronavirus 2 (SARS-CoV-2) infection (COVID-19)	Oral	Capsules
eclitasertib	No	Discontinued	Sanofi	eclitasertib (Generic) 975AT1P9J6 (Code) DNL-758 (Code) SAR-443122 (Code)	Cutaneous lupus erythematosus		Oral	Capsules
ocadusertib	Yes	Phase II	Lilly	ocadusertib (Generic) LY-3871801 (Code) R-552 (Code) S53J4A7ME4 (Code)	Rheumatoid arthritis	In patients with active moderately-to-severe rheumatoid arthritis	Oral
ocadusertib	Yes	Phase II	Rigel	ocadusertib (Generic) LY-3871801 (Code) R-552 (Code) S53J4A7ME4 (Code)	Rheumatoid arthritis	In patients with active moderately-to-severe rheumatoid arthritis	Oral
oditrasertib	Yes	Phase II	Sanofi	oditrasertib (Generic) DNL-788 (Code) I1YQT8HC89 (Code) SAR-443820 (Code)	Multiple sclerosis, primary progressive
oditrasertib	Yes	Phase II	Sanofi	oditrasertib (Generic) DNL-788 (Code) I1YQT8HC89 (Code) SAR-443820 (Code)	Multiple sclerosis, relapsing-remitting		Oral	Tablets
oditrasertib	Yes	Phase II	Sanofi	oditrasertib (Generic) DNL-788 (Code) I1YQT8HC89 (Code) SAR-443820 (Code)	Multiple sclerosis, secondary progressive
oditrasertib	No	Phase I	Sanofi	oditrasertib (Generic) DNL-788 (Code) I1YQT8HC89 (Code) SAR-443820 (Code)	Neurological Disorders	Treatment of neurological disorders, including amyotrophic lateral sclerosis, and Alzheimer's disease	Oral	Capsules
oditrasertib	No	Discontinued	Sanofi	oditrasertib (Generic) DNL-788 (Code) I1YQT8HC89 (Code) SAR-443820 (Code)	Amyotrophic lateral sclerosis		Oral	Tablets
oditrasertib	No	Preclinical	Denali Therapeutics	oditrasertib (Generic) DNL-788 (Code) I1YQT8HC89 (Code) SAR-443820 (Code)	Amyotrophic lateral sclerosis
oditrasertib	No	Preclinical	Denali Therapeutics	oditrasertib (Generic) DNL-788 (Code) I1YQT8HC89 (Code) SAR-443820 (Code)	Dementia, Alzheimer type
GFH-312	No	Phase II	Genfleet	GFH-312 (Code)	Peripheral arterial disease (PAD)	Treatment of peripheral artery disease with intermittent claudication
GFH-312	Yes	Phase I	Genfleet	GFH-312 (Code)	Autoimmune disease	Treatment of inflammatory autoimmune diseases	Oral	Tablets
GFH-312	Yes	Phase I	Genfleet	GFH-312 (Code)	Immune-mediated inflammatory disease	Treatment of auto-inflammatory diseases	Oral	Tablets
SIR1-365	Yes	Phase I	Sironax	SIR1-365 (Code)	Severe acute respiratory syndrome coronavirus 2 (SARS-CoV-2) infection (COVID-19)	In patients with severe COVID-19	Oral	Tablets
DNL-104	No	Discontinued	Denali Therapeutics	DNL-104 (Code)	Amyotrophic lateral sclerosis
DNL-104	No	Discontinued	Denali Therapeutics	DNL-104 (Code)	Dementia, Alzheimer type
DNL-747	No	Discontinued	Denali Therapeutics	DNL-747 (Code) SAR-443060 (Code)	Amyotrophic lateral sclerosis		Oral
DNL-747	No	Discontinued	Denali Therapeutics	DNL-747 (Code) SAR-443060 (Code)	Dementia, Alzheimer type		Oral
DNL-747	No	Discontinued	Denali Therapeutics	DNL-747 (Code) SAR-443060 (Code)	Multiple sclerosis		Oral
GSK-2982772	No	Phase II	GSK	2982772 (Code) GSK-2982772 (Code)	Plaque psoriasis	In adult patients with active plaque-type psoriasis	Oral	Tablets
GSK-2982772	No	Phase II	GSK	2982772 (Code) GSK-2982772 (Code)	Rheumatoid arthritis	In adult patients with moderate to severe rheumatoid arthritis	Oral	Tablets
GSK-2982772	No	Phase II	GSK	2982772 (Code) GSK-2982772 (Code)	Ulcerative colitis	In adult patients with active ulcerative colitis	Oral	Tablets
GSK-2982772	No	Discontinued	GSK	2982772 (Code) GSK-2982772 (Code)	Plaque psoriasis	In adult patients with moderate to severe plaque psoriasis	Oral	Tablets, modified release formulation
GSK-3145095	No	Discontinued	GSK	GSK-3145095 (Code)	Cancer, solid tumor	As monotherapy and in combination with pembrolizumab in patients with selected solid tumors	Oral	Capsules, tablets
GSK-3502421	Yes	Preclinical	Boston Pharmaceuticals	GSK-3502421 (Code)	Neurological Disorders	Treatment of central nervous system disorders
MK-4424	Yes	Preclinical	Merck & Co	MK-4424 (Code)	Neurodegeneration
SBL-01	Yes	Preclinical	SeaBeLife	sibiriline hydrochloride (Generic) SBL-01 (Code)	Liver failure	Prevention of acute liver failure
VRN-04	Yes	Preclinical	Voronoi	VRN-04 (Code)	Inflammatory bowel disease
Data up to 22 Oct 2024.
